# Supplementary material
Source: publisher site journal article supplement (https://www.dovepress.com/article/383996)
Supplement: Supplementary file 1 [file get_supplementary_file.php]

# Supplementary Information

## Acute kidney injury in patients with non-valvular atrial fibrillation treated with rivaroxaban or warfarin: a population-based study from the United Kingdom

Antonio González-Pérez, Yanina Balabanova, María E Sáez, Gunnar Brobert,  
Luis A Garcia Rodriguez

### Contents

**Supplementary Table 1.** Read codes for AKI.

**Supplementary Table 2.** Incidence rate per 10,000 person-years of AKI and HR (95% CI) comparing AKI in the rivaroxaban vs. warfarin cohorts, overall and stratified by baseline renal function: on-treatment analysis.

**Supplementary Table 3.** Incidence rate per 10,000 person-years of AKI and HR (95% CI) comparing AKI in the rivaroxaban vs. warfarin cohorts, overall and stratified by baseline renal function: as-treated analysis.

**Supplementary Table 4.** Incidence rate per 10,000 person-years of severe AKI (using AKI Method B – see footnote) and HR (95% CI) comparing AKI in the rivaroxaban vs. warfarin cohorts, overall and stratified by baseline renal function (intention-to-treat analysis).

**Supplementary Table 5.** Incidence rate per 10,000 person-years of severe AKI (using AKI Method B – see footnote) and HR (95% CI) comparing AKI in the rivaroxaban vs. warfarin cohorts, overall and stratified by baseline renal function (on-treatment analysis).

**Supplementary Table 6.** Incidence rate per 10,000 person-years of severe AKI (using AKI Method B – see footnote) and HR (95% CI) comparing AKI in the rivaroxaban vs. warfarin cohorts, overall and stratified by baseline renal function (as-treated analysis).

**Supplementary Table 7.** Incidence rate per 10,000 person-years of AKI and HR (95% CI) comparing AKI in the rivaroxaban vs. warfarin cohorts, stratified by baseline renal function (intention-to-treat analysis): Fine and Gray models.

**Supplementary Table 8.** Incidence rate per 10,000 person-years of AKI and HR (95% CI) comparing AKI in the rivaroxaban vs. warfarin cohorts, overall and stratified by baseline renal function: more stringent method B criteria (intention-to-treat analysis).

**Supplementary Table 9.** Incidence rate per 10,000 person-years of AKI and HR (95% CI) comparing AKI in the rivaroxaban vs. warfarin cohorts, overall and stratified by baseline renal function (using 60 mL/min/1.73m<sup>2</sup> as the cut-off) (intention-to-treat analysis).

**Supplementary Table 10.** Incidence rate per 10,000 person-years of AKI and HR (95% CI) comparing AKI in the rivaroxaban vs. warfarin cohorts, overall and stratified by baseline renal function: inverse propensity score weighting analysis (intention-to-treat analysis).

**Supplementary Table 11.** Incidence rate per 10,000 person-years of AKI and HR (95% CI) comparing AKI in the rivaroxaban vs. warfarin cohorts, overall and stratified by baseline renal function, with further adjustment for cerebrovascular events, infection in the previous year, antineoplastic agents, NSAIDs, diuretics, angiotensin receptor blockers and ACE inhibitors (intention-to-treat analysis).

**Supplementary Table 12.** Incidence rate per 10,000 person-years of AKI and HR (95% CI) comparing AKI in the rivaroxaban vs. warfarin cohorts, overall and stratified by baseline renal function, restricted to patients with heart failure (intention-to-treat analysis).

**Supplementary Table 13.** Incidence rate per 10,000 person-years of AKI and HR (95% CI) comparing AKI in the rivaroxaban vs. warfarin cohorts, overall and stratified by baseline renal function, restricted to patients with diabetes mellitus (intention-to-treat analysis).

**Supplementary Table 14.** Incidence rate per 10,000 person-years of AKI and HR (95% CI) comparing AKI in the rivaroxaban vs. warfarin cohorts, overall and stratified by baseline renal function, restricted to patients with patients aged >65 years (intention-to-treat analysis).

**Supplementary Figure 1.** AKI cases identified by the two case identification definitions.

AKI, acute kidney injury

**Supplementary Figure 2.** Kaplan–Meier plots showing time to AKI using **(A)** Method A, and **(B)** Method B.

**Supplementary Table 1.** Read codes for AKI.

| <b>Read code</b> | <b>Description</b>                                           |
|------------------|--------------------------------------------------------------|
| K04..00          | Acute renal failure                                          |
| K040.00          | Acute renal tubular necrosis                                 |
| K041.00          | Acute renal cortical necrosis                                |
| K042.00          | Acute renal medullary necrosis                               |
| K043.00          | Acute drug-induced renal failure                             |
| K044.00          | Acute renal fail urin obstruct                               |
| K04y.00          | Other acute renal failure                                    |
| K04z.00          | Acute renal failure NOS                                      |
| Kyu2000          | [X]Other acute renal failure                                 |
| G500400          | Acute pericarditis - uraemic                                 |
| K101000          | Acute pyelonephritis without medullary necrosis              |
| K101100          | Acute pyelonephritis with medullary necrosis                 |
| K04..11          | ARF - Acute renal failure                                    |
| K04..12          | Acute kidney injury                                          |
| K043000          | Acute renal failure due to ACE inhibitor                     |
| K043100          | Acute renal failure induced by aminoglycoside                |
| K043300          | Acute renal failure induced by cyclosporin A                 |
| K043400          | Acute renal failure induced by non-steroid anti-inflamm drug |
| K045.00          | Acute renal failure due to non-traumatic rhabdomyolysis      |
| K046.00          | Acute renal failure induced by toxin                         |
| K04B.00          | Acute renal failure due to traumatic rhabdomyolysis          |
| K04C.00          | Acute kidney injury stage 1                                  |
| K04D.00          | Acute kidney injury stage 2                                  |
| K04E.00          | Acute kidney injury stage 3                                  |

**Supplementary Table 2.** Incidence rate per 10,000 person-years of AKI and HR (95% CI) comparing AKI in the rivaroxaban vs. warfarin cohorts, overall and stratified by baseline renal function: on-treatment analysis.

| Baseline eGFR                      | Cohort               | Person-years | Incident AKI cases (N) | Incidence rate per 10,000 person-years | HR* (95% CI)     | p value |
|------------------------------------|----------------------|--------------|------------------------|----------------------------------------|------------------|---------|
| <b>AKI Method A</b>                |                      |              |                        |                                        |                  |         |
| Any eGFR                           | Warfarin (N=7129)    | 11,201.1     | 75                     | 67.0                                   | 1.0 (ref)        |         |
|                                    | Rivaroxaban (N=6436) | 9019.2       | 70                     | 77.6                                   | 1.18 (0.85–1.65) | 0.33    |
| eGFR >50mL/min/1.73m <sup>2</sup>  | Warfarin (N=6043)    | 9621.0       | 48                     | 49.9                                   | 1.0 (ref)        |         |
|                                    | Rivaroxaban (N=5547) | 7847.6       | 46                     | 58.6                                   | 1.16 (0.77–1.76) | 0.48    |
| eGFR ≤50 mL/min/1.73m <sup>2</sup> | Warfarin (N=1086)    | 1580.1       | 27                     | 170.9                                  | 1.0 (ref)        |         |
|                                    | Rivaroxaban (N=889)  | 1171.7       | 24                     | 204.8                                  | 1.15 (0.64–2.06) | 0.64    |
| <b>AKI Method B</b>                |                      |              |                        |                                        |                  |         |
| Any eGFR                           | Warfarin (N=7129)    | 11,022.7     | 278                    | 252.2                                  | 1.0 (ref)        |         |
|                                    | Rivaroxaban (N=6436) | 8918.1       | 175                    | 196.2                                  | 0.76 (0.62–0.92) | <0.01   |
| eGFR >50mL/min/1.73m <sup>2</sup>  | Warfarin (N=6043)    | 9484.6       | 206                    | 217.2                                  | 1.0 (ref)        |         |
|                                    | Rivaroxaban (N=5547) | 7760.2       | 133                    | 171.4                                  | 0.74 (0.59–0.92) | 0.01    |
| eGFR ≤50 mL/min/1.73m <sup>2</sup> | Warfarin (N=1086)    | 1538.1       | 72                     | 468.1                                  | 1.0 (ref)        |         |
|                                    | Rivaroxaban (N=889)  | 1157.9       | 42                     | 362.7                                  | 0.81 (0.54–1.20) | 0.28    |

**Note:** Method A was based on Read codes, and Method B was based on the Aberdeen algorithm.

\*Adjusted for age, sex, baseline eGFR (both as categorical and continuous variables), number of previous eGFR measurements at baseline, Townsend index, polymedication, smoking, body mass index, use of health services in the year before baseline (PCP visits, referrals and hospitalizations), comorbidity (ischemic heart disease, cancer, diabetes, heart failure and liver disease), frailty, CHA2DS2VASc score, and use of antiplatelets/anti-infectives.

AKI, acute kidney injury; CI, confidence interval; eGFR, estimated glomerular filtration rate; HR, hazard ratio; PCP; primary care practitioner

**Supplementary Table 3.** Incidence rate per 10,000 person-years of AKI and HR (95% CI) comparing AKI in the rivaroxaban vs. warfarin cohorts, overall and stratified by baseline renal function: as-treated analysis.

| Baseline eGFR                      | Cohort               | Person-years | Incident AKI cases (N) | Incidence rate per 10,000 person-years | HR* (95% CI)     | p value |
|------------------------------------|----------------------|--------------|------------------------|----------------------------------------|------------------|---------|
| <b>AKI Method A</b>                |                      |              |                        |                                        |                  |         |
| Any eGFR                           | Warfarin (N=7230)    | 14903.4      | 104                    | 69.8                                   | 1.0 (ref)        |         |
|                                    | Rivaroxaban (N=7045) | 12,064.0     | 93                     | 77.1                                   | 1.13 (0.85–1.50) | 0.4     |
| eGFR >50 mL/min/1.73m <sup>2</sup> | Warfarin (N=6124)    | 12,806.7     | 67                     | 52.32                                  | 1.0 (ref)        |         |
|                                    | Rivaroxaban (N=6081) | 10,567.3     | 62                     | 58.67                                  | 1.12 (0.79–1.58) | 0.54    |
| eGFR ≤50 mL/min/1.73m <sup>2</sup> | Warfarin (N=1106)    | 2096.7       | 37                     | 176.5                                  | 1.0 (ref)        |         |
|                                    | Rivaroxaban (N=964)  | 1496.7       | 31                     | 207.1                                  | 1.14 (0.69–1.87) | 0.61    |
| <b>AKI Method B</b>                |                      |              |                        |                                        |                  |         |
| Any eGFR                           | Warfarin (N=7225)    | 14,580.6     | 345                    | 236.6                                  | 1.0 (ref)        |         |
|                                    | Rivaroxaban (N=7020) | 11,861.3     | 216                    | 182.1                                  | 0.77 (0.65–0.91) | <0.01   |
| eGFR >50 mL/min/1.73m <sup>2</sup> | Warfarin (N=6119)    | 12,563.2     | 259                    | 206.2                                  | 1.0 (ref)        |         |
|                                    | Rivaroxaban (N=6057) | 10,390.5     | 167                    | 160.7                                  | 0.76 (0.63–0.93) | 0.01    |
| eGFR ≤50 mL/min/1.73m <sup>2</sup> | Warfarin (N=1106)    | 2017.5       | 86                     | 426.3                                  | 1.0 (ref)        |         |
|                                    | Rivaroxaban (N=963)  | 1470.9       | 49                     | 333.1                                  | 0.82 (0.57–1.18) | 0.28    |

**Note:** Method A was based on Read codes, and Method B was based on the Aberdeen algorithm.

\*Adjusted for age, sex, baseline eGFR (both as categorical and continuous variables), number of previous eGFR measurements at baseline, Townsend index, poly medication, smoking, body mass index, use of health services in the year before baseline (PCP visits, referrals and hospitalizations), comorbidity (ischemic heart disease, cancer, diabetes, heart failure and liver disease), frailty, CHA<sub>2</sub>DS<sub>2</sub>VASc score, and use of antiplatelets/anti-infectives.

AKI, acute kidney injury; CI, confidence interval; eGFR, estimated glomerular filtration rate; HR, hazard ratio; PCP; primary care practitioner

**Supplementary Table 4.** Incidence rate per 10,000 person-years of severe AKI (using AKI Method B – see footnote) and HR (95% CI) comparing AKI in the rivaroxaban vs. warfarin cohorts, overall and stratified by baseline renal function (intention-to-treat analysis).

| Baseline eGFR                      | Cohort               | Person-years | Incident severe AKI cases (N) | Incidence rate per 10,000 person-years | HR* (95% CI)     | p value |
|------------------------------------|----------------------|--------------|-------------------------------|----------------------------------------|------------------|---------|
| Any eGFR                           | Warfarin (N=7129)    | 19,492.2     | 104                           | 53.4                                   | 1.0 (ref)        |         |
|                                    | Rivaroxaban (N=6436) | 13,686.8     | 54                            | 39.5                                   | 0.74 (0.53–1.04) | 0.08    |
| eGFR >50mL/min/1.73m <sup>2</sup>  | Warfarin (N=6043)    | 16,946.4     | 78                            | 46.0                                   | 1.0 (ref)        |         |
|                                    | Rivaroxaban (N=5547) | 11,963.1     | 38                            | 31.8                                   | 0.68 (0.46–1.01) | 0.06    |
| eGFR ≤50 mL/min/1.73m <sup>2</sup> | Warfarin (N=1086)    | 2545.8       | 26                            | 102.1                                  | 1.0 (ref)        |         |
|                                    | Rivaroxaban (N=889)  | 1723.6       | 16                            | 92.8                                   | 0.95 (0.50–1.82) | 0.88    |

**Note:** Method B was based on the Aberdeen algorithm. Severe AKI was defined as stage 2 or 3 AKI.

\*Adjusted for age, sex, baseline eGFR (both as categorical and continuous variables), number of previous eGFR measurements at baseline, Townsend index, poly medication, smoking, body mass index, use of health services in the year before baseline (PCP visits, referrals and hospitalizations), comorbidity (ischemic heart disease, cancer, diabetes, heart failure and liver disease), frailty, CHA<sub>2</sub>DS<sub>2</sub>VASc score, and use of antiplatelets/anti-infectives.

AKI, acute kidney injury; CI, confidence interval; eGFR, estimated glomerular filtration rate; HR, hazard ratio; PCP; primary care practitioner

**Supplementary Table 5.** Incidence rate per 10,000 person-years of severe AKI (using AKI Method B – see footnote) and HR (95% CI) comparing AKI in the rivaroxaban vs. warfarin cohorts, overall and stratified by baseline renal function (on-treatment analysis).

| Baseline eGFR                      | Cohort               | Person-years | Incident severe AKI cases (N) | Incidence rate per 10,000 person-years | HR* (95% CI)     | p value |
|------------------------------------|----------------------|--------------|-------------------------------|----------------------------------------|------------------|---------|
| Any eGFR                           | Warfarin (N=7129)    | 11,022.7     | 63                            | 57.2                                   | 1.0 (ref)        |         |
|                                    | Rivaroxaban (N=6436) | 8918.1       | 40                            | 44.9                                   | 0.81 (0.54–1.21) | 0.30    |
| eGFR >50mL/min/1.73m <sup>2</sup>  | Warfarin (N=6043)    | 9484.6       | 45                            | 47.5                                   | 1.0 (ref)        |         |
|                                    | Rivaroxaban (N=5547) | 7760.2       | 26                            | 33.5                                   | 0.68 (0.41–1.11) | 0.13    |
| eGFR ≤50 mL/min/1.73m <sup>2</sup> | Warfarin (N=1086)    | 1538.1       | 18                            | 117.0                                  | 1.0 (ref)        |         |
|                                    | Rivaroxaban (N=889)  | 1157.9       | 14                            | 120.9                                  | 1.10 (0.53–2.29) | 0.79    |

**Note:** Method B was based on the Aberdeen algorithm. Severe AKI was defined as stage 2 or 3 AKI.

\*Adjusted for age, sex, baseline eGFR (both as categorical and continuous variables), number of previous eGFR measurements at baseline, Townsend index, poly medication, smoking, body mass index, use of health services in the year before baseline (PCP visits, referrals and hospitalizations), comorbidity (ischemic heart disease, cancer, diabetes, heart failure and liver disease), frailty, CHA<sub>2</sub>DS<sub>2</sub>VASc score, and use of antiplatelets/anti-infectives.

AKI, acute kidney injury; CI, confidence interval; eGFR, estimated glomerular filtration rate; HR, hazard ratio; PCP; primary care practitioner



**Supplementary Table 6.** Incidence rate per 10,000 person-years of severe AKI (using AKI Method B – see footnote) and HR (95% CI) comparing AKI in the rivaroxaban vs. warfarin cohorts, overall and stratified by baseline renal function (as-treated analysis).

| Baseline eGFR                      | Cohort               | Person-years | Incident severe AKI cases (N) | Incidence rate per 10,000 person-years | HR* (95% CI)     | p value |
|------------------------------------|----------------------|--------------|-------------------------------|----------------------------------------|------------------|---------|
| Any eGFR                           | Warfarin (N=7225)    | 14,580.6     | 76                            | 52.12                                  | 1.0 (ref)        |         |
|                                    | Rivaroxaban (N=7020) | 11,861.3     | 49                            | 41.31                                  | 0.82 (0.57–1.18) | 0.29    |
| eGFR >50mL/min/1.73m <sup>2</sup>  | Warfarin (N=6119)    | 12,563.2     | 52                            | 41.39                                  | 1.0 (ref)        |         |
|                                    | Rivaroxaban (N=6057) | 10,390.5     | 35                            | 33.68                                  | 0.82 (0.53–1.27) | 0.38    |
| eGFR ≤50 mL/min/1.73m <sup>2</sup> | Warfarin (N=1106)    | 2017.5       | 24                            | 118.96                                 | 1.0 (ref)        |         |
|                                    | Rivaroxaban (N=963)  | 1470.9       | 14                            | 95.18                                  | 0.85 (0.43–1.69) | 0.65    |

**Note:** Method B was based on the Aberdeen algorithm. Severe AKI was defined as stage 2 or 3 AKI.

\*Adjusted for age, sex, baseline eGFR (both as categorical and continuous variables), number of previous eGFR measurements at baseline, Townsend index, poly medication, smoking, body mass index, use of health services in the year before baseline (PCP visits, referrals and hospitalizations), comorbidity (ischemic heart disease, cancer, diabetes, heart failure and liver disease), frailty, CHA<sub>2</sub>DS<sub>2</sub>VASc score, and use of antiplatelets/anti-infectives.

AKI, acute kidney injury; CI, confidence interval; eGFR, estimated glomerular filtration rate; HR, hazard ratio; PCP; primary care practitioner

**Supplementary Table 7.** Incidence rate per 10,000 person-years of AKI and HR (95% CI) comparing AKI in the rivaroxaban vs. warfarin cohorts, stratified by baseline renal function (intention-to-treat analysis): Fine and Gray models.

| Cohort                           | Person-years | Incident AKI cases (N) | Incidence rate per 10,000 person-years | SHR* (95% CI)    | p value |
|----------------------------------|--------------|------------------------|----------------------------------------|------------------|---------|
| <b>AKI Method A</b>              |              |                        |                                        |                  |         |
| Warfarin (N=7129)                | 20,027.6     | 136                    | 67.9                                   | 1.00 (ref)       |         |
| Rivaroxaban (N=6436)             | 13,917.5     | 113                    | 81.2                                   | 1.15 (0.89–1.47) | 0.29    |
| <b>AKI Method B (any AKI)</b>    |              |                        |                                        |                  |         |
| Warfarin (N=7129)                | 19,492.2     | 457                    | 234.5                                  | 1.00 (ref)       |         |
| Rivaroxaban (N=6436)             | 13,686.8     | 266                    | 194.4                                  | 0.77 (0.66–0.89) | <0.01   |
| <b>AKI Method B (severe AKI)</b> |              |                        |                                        |                  |         |
| Warfarin (N=7129)                | 19,492.2     | 104                    | 53.4                                   | 1.00 (ref)       |         |
| Rivaroxaban (N=6436)             | 13,686.8     | 54                     | 39.5                                   | 0.72 (0.51–1.00) | 0.05    |

**Note:** Method A was based on Read codes, and Method B was based on the Aberdeen algorithm. Severe AKI was defined as stage 2 or 3 AKI. (stage 1 was included as a competing risk).

\*Adjusted for age, sex, baseline eGFR (both as categorical and continuous variables), number of previous eGFR measurements at baseline, Townsend index, poly medication, smoking, body mass index, use of health services in the year before baseline (PCP visits, referrals and hospitalizations), comorbidity (ischemic heart disease, cancer, diabetes, heart failure and liver disease), frailty, CHA<sub>2</sub>DS<sub>2</sub>VASc score, and use of antiplatelets/anti-infectives.

AKI, acute kidney injury; CI, confidence interval; eGFR, estimated glomerular filtration rate; SHR, sub-distribution hazard ratio; PCP; primary care practitioner

**Supplementary Table 8.** Incidence rate per 10,000 person-years of AKI and HR (95% CI) comparing AKI in the rivaroxaban vs. warfarin cohorts, overall and stratified by baseline renal function: more stringent method B criteria (intention-to-treat analysis).

| Baseline eGFR                                               | Cohort               | Person-years | Incident AKI cases (N) | Incidence rate per 10,000 person-years | HR* (95% CI)     | p value |
|-------------------------------------------------------------|----------------------|--------------|------------------------|----------------------------------------|------------------|---------|
| <b>AKI algorithm (meeting criterion 2 or 3)<sup>†</sup></b> |                      |              |                        |                                        |                  |         |
| Any eGFR                                                    | Warfarin (N=7129)    | 20,134.2     | 60                     | 29.8                                   | 1.0 (ref)        |         |
|                                                             | Rivaroxaban (N=6436) | 14,029.4     | 21                     | 15.0                                   | 0.50 (0.30–0.84) | 0.01    |
| eGFR >50                                                    | Warfarin (N=6043)    | 17,455.3     | 38                     | 21.8                                   | 1.0 (ref)        |         |
|                                                             | Rivaroxaban (N=5547) | 12,236.7     | 15                     | 12.3                                   | 0.53 (0.28–1.00) | 0.05    |
| eGFR ≤50                                                    | Warfarin (N=1086)    | 2678.8       | 22                     | 82.1                                   | 1.0 (ref)        |         |
|                                                             | Rivaroxaban (N=889)  | 1792.7       | 6                      | 33.5                                   | 0.36 (0.14–0.97) | 0.04    |
| <b>AKI algorithm (meeting criterion 3)<sup>‡</sup></b>      |                      |              |                        |                                        |                  |         |
| Any eGFR                                                    | Warfarin (N=7129)    | 20,159.0     | 37                     | 18.4                                   | 1.0 (ref)        |         |
|                                                             | Rivaroxaban (N=6436) | 14,041.6     | 11                     | 7.8                                    | 0.41 (0.20–0.84) | 0.01    |
| eGFR >50                                                    | Warfarin (N=6043)    | 17,478.0     | 19                     | 10.9                                   | 1.0 (ref)        |         |
|                                                             | Rivaroxaban (N=5547) | 12,243.7     | 9                      | 7.3                                    | 0.70 (0.29–1.67) | 0.42    |
| eGFR ≤50                                                    | Warfarin (N=1086)    | 2681.1       | 18                     | 67.1                                   | 1.0 (ref)        |         |
|                                                             | Rivaroxaban (N=889)  | 1797.9       | 2                      | 11.1                                   | 0.15 (0.03–0.71) | 0.02    |

**Note:** Method A was based on Read codes, and Method B was based on the Aberdeen algorithm.

\*Adjusted for age, sex, baseline eGFR (both as categorical and continuous variables), number of previous eGFR measurements at baseline, Townsend index, polymedication, smoking, body mass index, use of health services in the year before baseline (PCP visits, referrals and hospitalizations), comorbidity (ischemic heart disease, cancer, diabetes, heart failure and liver disease), frailty, CHA<sub>2</sub>DS<sub>2</sub>VASc score, and use of antiplatelets/anti-infectives.

<sup>†</sup>Serum creatinine ≥1.5 times higher than the lowest creatinine within 7 days (criterion 2) or serum creatinine >26 µmol/L higher than the lowest creatinine within 48 hours (criterion 3).

<sup>‡</sup>Serum creatinine >26 µmol/L higher than the lowest creatinine within 48 hours (criterion 3).

AKI, acute kidney injury; CI, confidence interval; eGFR, estimated glomerular filtration rate; HR, hazard ratio; PCP; primary care practitioner

**Supplementary Table 9.** Incidence rate per 10,000 person-years of AKI and HR (95% CI) comparing AKI in the rivaroxaban vs. warfarin cohorts, overall and stratified by baseline renal function (using 60 mL/min/1.73m<sup>2</sup> as the cut-off) (intention-to-treat analysis).

| Baseline eGFR                      | Cohort               | Person-years | Incident AKI cases (N) | Incidence rate per 10,000 person-years | HR* (95% CI)     | p value |
|------------------------------------|----------------------|--------------|------------------------|----------------------------------------|------------------|---------|
| <b>AKI Method A</b>                |                      |              |                        |                                        |                  |         |
| Any eGFR                           | Warfarin (N=7129)    | 20,028       | 136                    | 67.91                                  | 1.0 (ref)        |         |
|                                    | Rivaroxaban (N=6436) | 13,917       | 113                    | 81.19                                  | 1.19 (0.92–1.54) | 0.18    |
| eGFR >60 mL/min/1.73m <sup>2</sup> | Warfarin (N=4921)    | 14,338       | 66                     | 46.0                                   | 1.0 (ref)        |         |
|                                    | Rivaroxaban (N=4537) | 10,051       | 47                     | 46.8                                   | 0.98 (0.67–1.44) | 0.91    |
| eGFR ≤60 mL/min/1.73m <sup>2</sup> | Warfarin (N=2208)    | 5690         | 70                     | 123.0                                  | 1.0 (ref)        |         |
|                                    | Rivaroxaban (N=1899) | 3866         | 66                     | 170.7                                  | 1.39 (0.98–1.97) | 0.06    |
| <b>AKI Method B</b>                |                      |              |                        |                                        |                  |         |
| Any eGFR                           | Warfarin (N=7129)    | 19,492       | 457                    | 234.45                                 | 1.0 (ref)        |         |
|                                    | Rivaroxaban (N=6436) | 13,687       | 266                    | 194.35                                 | 0.80 (0.68–0.93) | 0.00    |
| eGFR >60 mL/min/1.73m <sup>2</sup> | Warfarin (N=4921)    | 13,986       | 270                    | 193.1                                  | 1.0 (ref)        |         |
|                                    | Rivaroxaban (N=4537) | 9893         | 154                    | 155.7                                  | 0.75 (0.61–0.92) | <0.01   |
| eGFR ≤60 mL/min/1.73m <sup>2</sup> | Warfarin (N=2208)    | 5507         | 187                    | 339.6                                  | 1.0 (ref)        |         |
|                                    | Rivaroxaban (N=1899) | 3793         | 112                    | 295.3                                  | 0.86 (0.67–1.09) | 0.21    |

**Note:** Method A was based on Read codes, and Method B was based on the Aberdeen algorithm.

\*Adjusted for age, sex, baseline eGFR (both as categorical and continuous variables), number of previous eGFR measurements at baseline, Townsend index, polymedication, smoking, body mass index, use of health services in the year before baseline (PCP visits, referrals and hospitalizations), comorbidity (ischemic heart disease, cancer, diabetes, heart failure and liver disease), frailty, CHA<sub>2</sub>DS<sub>2</sub>VASc score, and use of antiplatelets/anti-infectives.

AKI, acute kidney injury; CI, confidence interval; eGFR, estimated glomerular filtration rate; HR, hazard ratio; PCP; primary care practitioner

**Supplementary Table 10.** Incidence rate per 10,000 person-years of AKI and HR (95% CI) comparing AKI in the rivaroxaban vs. warfarin cohorts, overall and stratified by baseline renal function: inverse propensity score weighting analysis (intention-to-treat analysis).

| Baseline eGFR                      | Cohort               | Person-years | Incident AKI cases (N) | Incidence rate per 10,000 person-years | HR* (95% CI)     | p value |
|------------------------------------|----------------------|--------------|------------------------|----------------------------------------|------------------|---------|
| <b>AKI Method A</b>                |                      |              |                        |                                        |                  |         |
| Any eGFR                           | Warfarin (N=7128)    | 19,907       | 133                    | 66.7                                   | 1.0 (ref)        |         |
|                                    | Rivaroxaban (N=6437) | 14,062       | 113                    | 80.1                                   | 1.19 (0.92–1.54) | 0.17    |
| eGFR >50 mL/min/1.73m <sup>2</sup> | Warfarin (N=6093)    | 17,391       | 93                     | 53.4                                   | 1.0 (ref)        |         |
|                                    | Rivaroxaban (N=5499) | 12,158       | 72                     | 59.2                                   | 1.12 (0.82–1.53) | 0.49    |
| eGFR ≤50 mL/min/1.73m <sup>2</sup> | Warfarin (N=1035)    | 2516         | 40                     | 159.2                                  | 1.0 (ref)        |         |
|                                    | Rivaroxaban (N=938)  | 1903         | 41                     | 213.5                                  | 1.32 (0.85–2.05) | 0.22    |
| <b>AKI Method B</b>                |                      |              |                        |                                        |                  |         |
| Any eGFR                           | Warfarin (N=7128)    | 19,397       | 441                    | 227.6                                  | 1.0 (ref)        |         |
|                                    | Rivaroxaban (N=6437) | 13,822       | 273                    | 197.4                                  | 0.82 (0.70–0.96) | 0.01    |
| eGFR >50 mL/min/1.73m <sup>2</sup> | Warfarin (N=6093)    | 16,981       | 344                    | 202.6                                  | 1.0 (ref)        |         |
|                                    | Rivaroxaban (N=5499) | 11,964       | 209                    | 174.3                                  | 0.81 (0.68–0.97) | 0.02    |
| eGFR ≤50 mL/min/1.73m <sup>2</sup> | Warfarin (N=1035)    | 2416         | 97                     | 402.7                                  | 1.0 (ref)        |         |
|                                    | Rivaroxaban (N=938)  | 1858         | 64                     | 346.1                                  | 0.83 (0.60–1.16) | 0.27    |

**Note:** Method A was based on Read codes, and Method B was based on the Aberdeen algorithm.

\*Adjusted for age, sex, baseline eGFR (both as categorical and continuous variables), number of previous eGFR measurements at baseline, Townsend index, polymedication, smoking, body mass index, use of health services in the year before baseline (PCP visits, referrals and hospitalizations), comorbidity (ischemic heart disease, cancer, diabetes, heart failure and liver disease), frailty, CHA<sub>2</sub>DS<sub>2</sub>VASc score, and use of antiplatelets/anti-infectives.

AKI, acute kidney injury; CI, confidence interval; eGFR, estimated glomerular filtration rate; HR, hazard ratio; PCP; primary care practitioner

**Supplementary Table 11.** Incidence rate per 10,000 person-years of AKI and HR (95% CI) comparing AKI in the rivaroxaban vs. warfarin cohorts, overall and stratified by baseline renal function: with further adjustment for cerebrovascular events, infection in the previous year, antineoplastic agents, NSAIDs, diuretics, angiotensin receptor blockers and ACE inhibitors (intention-to-treat analysis).

| Baseline eGFR                      | Cohort               | Person-years | Incident AKI cases (N) | Incidence rate per 10,000 person-years | HR* (95% CI)     | p value |
|------------------------------------|----------------------|--------------|------------------------|----------------------------------------|------------------|---------|
| <b>AKI Method A</b>                |                      |              |                        |                                        |                  |         |
| Any eGFR                           | Warfarin (N=7129)    | 20028        | 136                    | 67.9                                   | 1.0 (ref)        | 0.19    |
|                                    | Rivaroxaban (N=6436) | 13917        | 113                    | 81.2                                   | 1.18 (0.92–1.53) | 0.19    |
| eGFR >50 mL/min/1.73m <sup>2</sup> | Warfarin (N=6043)    | 17367        | 93                     | 53.6                                   | 1.0 (ref)        |         |
|                                    | Rivaroxaban (N=5547) | 12155        | 74                     | 60.9                                   | 1.13 (0.82–1.54) | 0.46    |
| eGFR ≤50 mL/min/1.73m <sup>2</sup> | Warfarin (N=1086)    | 2661         | 43                     | 161.6                                  | 1.0 (ref)        |         |
|                                    | Rivaroxaban (N=889)  | 1762         | 39                     | 221.3                                  | 1.3 (0.81–2.07)  | 0.28    |
| <b>AKI Method B</b>                |                      |              |                        |                                        |                  |         |
| Any eGFR                           | Warfarin (N=7129)    | 19492        | 457                    | 234.5                                  | 1.0 (ref)        |         |
|                                    | Rivaroxaban (N=6436) | 13687        | 266                    | 194.4                                  | 0.8 (0.69–0.94)  | 0.01    |
| eGFR >50 mL/min/1.73m <sup>2</sup> | Warfarin (N=6043)    | 16946        | 349                    | 205.9                                  | 1.0 (ref)        |         |
|                                    | Rivaroxaban (N=5547) | 11963        | 208                    | 173.9                                  | 0.79 (0.67–0.95) | 0.01    |
| eGFR ≤50 mL/min/1.73m <sup>2</sup> | Warfarin (N=1086)    | 2546         | 108                    | 424.2                                  | 1.0 (ref)        |         |
|                                    | Rivaroxaban (N=889)  | 1724         | 58                     | 336.5                                  | 0.81 (0.58–1.12) | 0.2     |

**Note:** Method A was based on Read codes, and Method B was based on the Aberdeen algorithm.

\*Adjusted for age, sex, baseline eGFR (both as categorical and continuous variables), number of previous eGFR measurements at baseline, Townsend index, polymedication, smoking, body mass index, use of health services in the year before baseline (PCP visits, referrals and hospitalizations), comorbidity (ischemic heart disease, cancer, diabetes, heart failure, liver disease, cerebrovascular events, infection in the previous year, antineoplastic agents, NSAIDs, diuretics, angiotensin receptor blockers and ACE inhibitors, frailty, CHA<sub>2</sub>DS<sub>2</sub>VASc score, and use of antiplatelets/anti-infectives).

ACE, angiotensin-converting enzyme; AKI, acute kidney injury; CI, confidence interval; eGFR, estimated glomerular filtration rate; HR, hazard ratio; NSAID, non-steroidal anti-inflammatory drug; PCP; primary care practitioner

**Supplementary Table 12.** Incidence rate per 10,000 person-years of AKI and HR (95% CI) comparing AKI in the rivaroxaban vs. warfarin cohorts, overall and stratified by baseline renal function, **restricted to patients with heart failure** (intention-to-treat analysis).

| Baseline eGFR                      | Cohort              | Person-years | Incident AKI cases (N) | Incidence rate per 10,000 person-years | HR* (95% CI)     | p value |
|------------------------------------|---------------------|--------------|------------------------|----------------------------------------|------------------|---------|
| <b>AKI Method A</b>                |                     |              |                        |                                        |                  |         |
| Any eGFR                           | Warfarin (N=901)    | 2269         | 35                     | 154.3                                  | 1.0 (ref)        | 0.42    |
|                                    | Rivaroxaban (N=720) | 1460         | 19                     | 130.1                                  | 0.78 (0.43–1.41) |         |
| eGFR >50 mL/min/1.73m <sup>2</sup> | Warfarin (N=661)    | 1760         | 20                     | 113.6                                  | 1.0 (ref)        | 0.52    |
|                                    | Rivaroxaban (N=570) | 1193         | 13                     | 109.0                                  | 0.78 (0.36–1.69) |         |
| eGFR ≤50 mL/min/1.73m <sup>2</sup> | Warfarin (N=240)    | 509          | 15                     | 294.9                                  | 1.0 (ref)        | 0.46    |
|                                    | Rivaroxaban (N=150) | 267          | 6                      | 224.7                                  | 0.59 (0.14–2.44) |         |
| <b>AKI Method B</b>                |                     |              |                        |                                        |                  |         |
| Any eGFR                           | Warfarin (N=901)    | 2142         | 108                    | 504.3                                  | 1.0 (ref)        | 0.46    |
|                                    | Rivaroxaban (N=720) | 1389         | 67                     | 482.2                                  | 0.89 (0.65–1.22) |         |
| eGFR >50 mL/min/1.73m <sup>2</sup> | Warfarin (N=661)    | 1655         | 76                     | 459.1                                  | 1.0 (ref)        | 0.54    |
|                                    | Rivaroxaban (N=570) | 1138         | 52                     | 457.1                                  | 0.89 (0.62–1.29) |         |
| eGFR ≤50 mL/min/1.73m <sup>2</sup> | Warfarin (N=240)    | 486          | 32                     | 658.3                                  | 1.0 (ref)        | 0.95    |
|                                    | Rivaroxaban (N=150) | 252          | 15                     | 595.8                                  | 0.98 (0.48–1.98) |         |

**Note:** Method A was based on Read codes, and Method B was based on the Aberdeen algorithm.

\*Adjusted for age, sex, baseline eGFR (both as categorical and continuous variables), number of previous eGFR measurements at baseline, Townsend index, polymedication, smoking, body mass index, use of health services in the year before baseline (PCP visits, referrals and hospitalizations), comorbidity (ischemic heart disease, cancer, diabetes, heart failure and liver disease), frailty, CHA<sub>2</sub>DS<sub>2</sub>VASc score, and use of antiplatelets/anti-infectives.

AKI, acute kidney injury; CI, confidence interval; eGFR, estimated glomerular filtration rate; HR, hazard ratio; PCP; primary care practitioner

**Supplementary Table 13.** Incidence rate per 10,000 person-years of AKI and HR (95% CI) comparing AKI in the rivaroxaban vs. warfarin cohorts, overall and stratified by baseline renal function, **restricted to patients with diabetes mellitus** (intention-to-treat analysis).

| Baseline eGFR                      | Cohort               | Person-years | Incident AKI cases (N) | Incidence rate per 10,000 person-years | HR* (95% CI)     | p value |
|------------------------------------|----------------------|--------------|------------------------|----------------------------------------|------------------|---------|
| <b>AKI Method A</b>                |                      |              |                        |                                        |                  |         |
| Any eGFR                           | Warfarin (N=1601)    | 4327         | 47                     | 108.6                                  | 1.0 (ref)        |         |
|                                    | Rivaroxaban (N=1375) | 2959         | 38                     | 128.4                                  | 1.32 (0.85–2.06) | 0.22    |
| eGFR >50 mL/min/1.73m <sup>2</sup> | Warfarin (N=1247)    | 3476         | 32                     | 92.1                                   | 1.0 (ref)        |         |
|                                    | Rivaroxaban (N=1123) | 2430         | 27                     | 111.1                                  | 1.35 (0.79–2.30) | 0.27    |
| eGFR ≤50 mL/min/1.73m <sup>2</sup> | Warfarin (N=354)     | 850          | 15                     | 176.4                                  | 1.0 (ref)        |         |
|                                    | Rivaroxaban (N=252)  | 529          | 11                     | 208.0                                  | 1.61 (0.63–4.11) | 0.32    |
| <b>AKI Method B</b>                |                      |              |                        |                                        |                  |         |
| Any eGFR                           | Warfarin (N=1601)    | 4095         | 187                    | 456.6                                  | 1.0 (ref)        |         |
|                                    | Rivaroxaban (N=1375) | 2871         | 93                     | 323.9                                  | 0.70 (0.54–0.90) | 0.01    |
| eGFR >50 mL/min/1.73m <sup>2</sup> | Warfarin (N=1247)    | 3310         | 135                    | 407.9                                  | 1.0 (ref)        |         |
|                                    | Rivaroxaban (N=1123) | 2376         | 65                     | 273.6                                  | 0.63 (0.46–0.85) | <0.01   |
| eGFR ≤50 mL/min/1.73m <sup>2</sup> | Warfarin (N=354)     | 785          | 52                     | 662.2                                  | 1.0 (ref)        |         |
|                                    | Rivaroxaban (N=252)  | 495          | 28                     | 565.4                                  | 0.94 (0.57–1.55) | 0.8     |

**Note:** Method A was based on Read codes, and Method B was based on the Aberdeen algorithm.

\*Adjusted for age, sex, baseline eGFR (both as categorical and continuous variables), number of previous eGFR measurements at baseline, Townsend index, poly medication, smoking, body mass index, use of health services in the year before baseline (PCP visits, referrals and hospitalizations), comorbidity (ischemic heart disease, cancer, diabetes, heart failure and liver disease), frailty, CHA<sub>2</sub>DS<sub>2</sub>VASc score, and use of antiplatelets/anti-infectives.

AKI, acute kidney injury; CI, confidence interval; eGFR, estimated glomerular filtration rate; HR, hazard ratio; PCP; primary care practitioner



**Supplementary Table 14.** Incidence rate per 10,000 person-years of AKI and HR (95% CI) comparing AKI in the rivaroxaban vs. warfarin cohorts, overall and stratified by baseline renal function, **restricted to patients with patients aged >65 years** (intention-to-treat analysis).

| Baseline eGFR                      | Cohort               | Person-years | Incident AKI cases (N) | Incidence rate per 10,000 person-years | HR* (95% CI)     | p value |
|------------------------------------|----------------------|--------------|------------------------|----------------------------------------|------------------|---------|
| <b>AKI Method A</b>                |                      |              |                        |                                        |                  |         |
| Any eGFR                           | Warfarin (N=5951)    | 16,362       | 126                    | 77.0                                   | 1.0 (ref)        |         |
|                                    | Rivaroxaban (N=5239) | 11,150       | 100                    | 89.7                                   | 1.13 (0.86–1.48) | 0.38    |
| eGFR >50 mL/min/1.73m <sup>2</sup> | Warfarin (N=4902)    | 13,815       | 85                     | 61.5                                   | 1.0 (ref)        |         |
|                                    | Rivaroxaban (N=4369) | 9428         | 62                     | 65.8                                   | 1.02 (0.73–1.43) | 0.89    |
| eGFR ≤50 mL/min/1.73m <sup>2</sup> | Warfarin (N=1049)    | 2547         | 41                     | 161.0                                  | 1.0 (ref)        |         |
|                                    | Rivaroxaban (N=870)  | 1722         | 38                     | 220.7                                  | 1.28 (0.81–2.05) | 0.29    |
| <b>AKI Method B</b>                |                      |              |                        |                                        |                  |         |
| Any eGFR                           | Warfarin (N=XXX)     | 15,899       | 410                    | 257.9                                  | 1.0 (ref)        |         |
|                                    | Rivaroxaban (N=XXX)  | 10,955       | 232                    | 211.8                                  | 0.78 (0.66–0.92) | <0.01   |
| eGFR >50 mL/min/1.73m <sup>2</sup> | Warfarin (N=XXX)     | 13,466       | 305                    | 226.5                                  | 1.0 (ref)        |         |
|                                    | Rivaroxaban (N=XXX)  | 9275         | 174                    | 187.6                                  | 0.76 (0.63–0.92) | 0.01    |
| eGFR ≤50 mL/min/1.73m <sup>2</sup> | Warfarin (N=XXX)     | 2433         | 105                    | 431.5                                  | 1.0 (ref)        |         |
|                                    | Rivaroxaban (N=XXX)  | 1680         | 58                     | 345.3                                  | 0.82 (0.59–1.15) | 0.25    |

**Note:** Method A was based on Read codes, and Method B was based on the Aberdeen algorithm.

\*Adjusted for age, sex, baseline eGFR (both as categorical and continuous variables), number of previous eGFR measurements at baseline, Townsend index, poly medication, smoking, body mass index, use of health services in the year before baseline (PCP visits, referrals and hospitalizations), comorbidity (ischemic heart disease, cancer, diabetes, heart failure and liver disease), frailty, CHA<sub>2</sub>DS<sub>2</sub>VASc score, and use of antiplatelets/anti-infectives.

AKI, acute kidney injury; CI, confidence interval; eGFR, estimated glomerular filtration rate; HR, hazard ratio; PCP; primary care practitioner

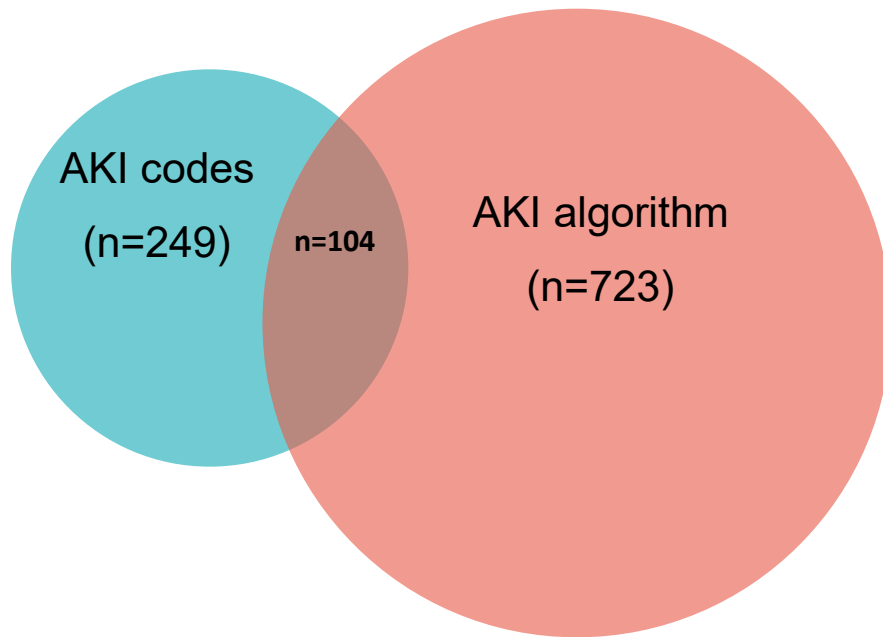

**Supplementary Figure 1.** AKI cases identified by the two case identification definitions.  
AKI, acute kidney injury

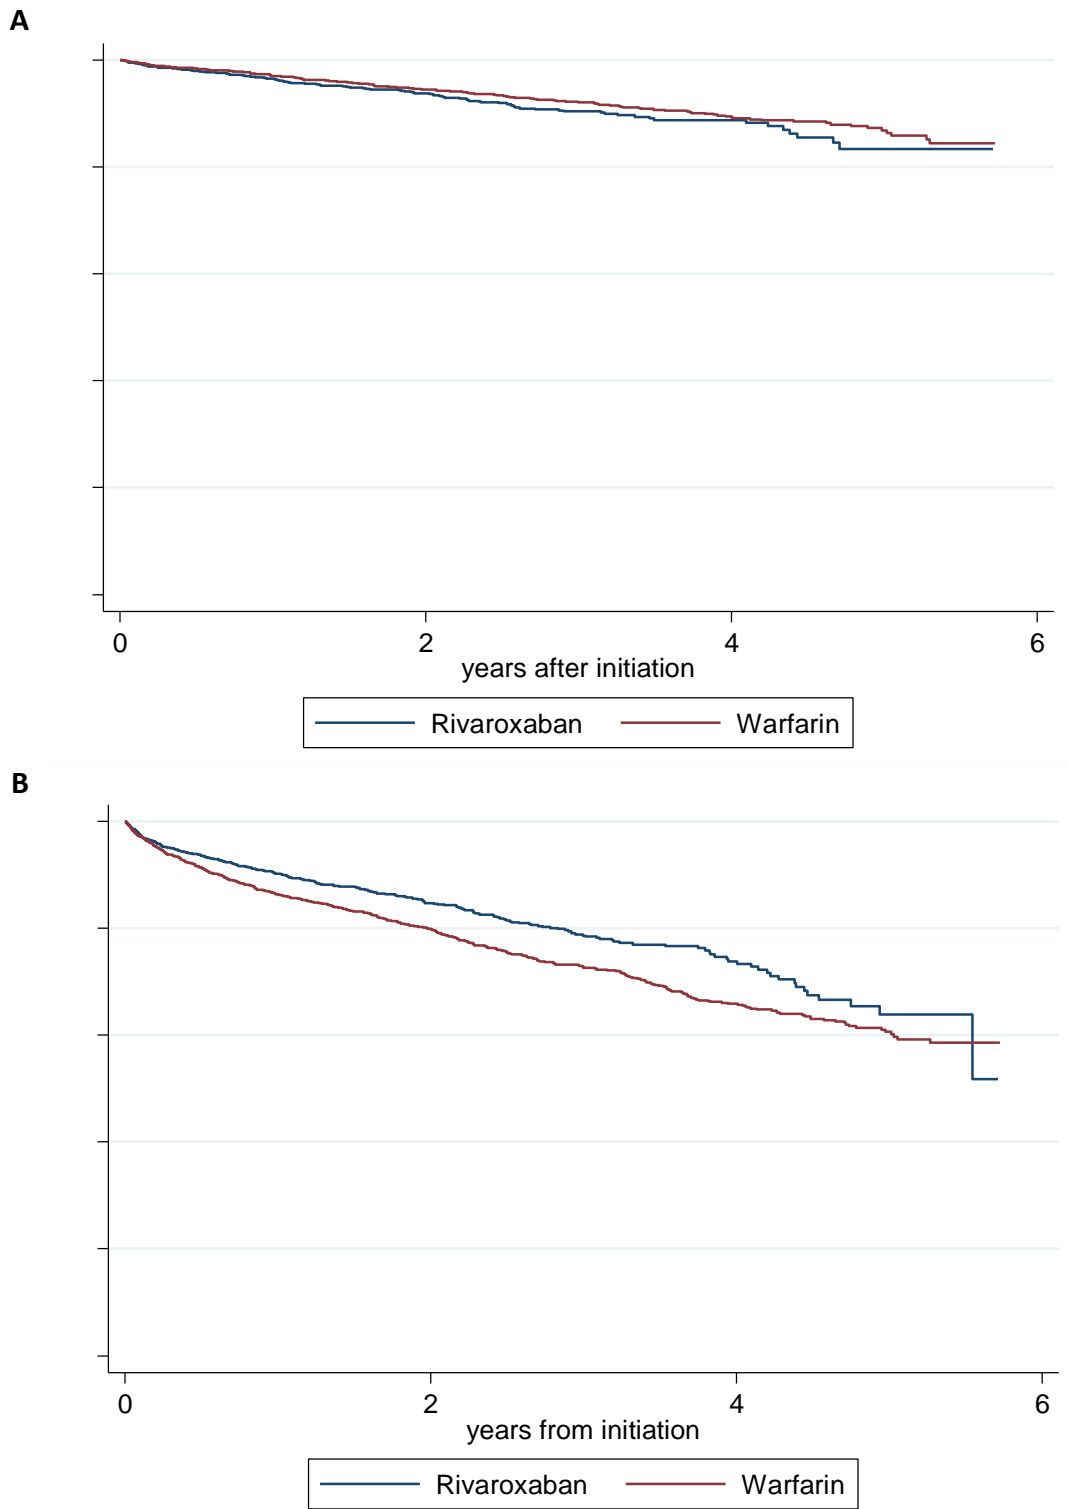

**Supplementary Figure 2.** Kaplan–Meier plots showing time to AKI using **(A)** Method A, and **(B)** Method B.
